# Supplementary material
Source: PubMed Central journal article supplement (PMC10464624)
Supplement: NIHMS1925494-supplement-Supplementary_data.pdf [file NIHMS1925494-supplement-Supplementary_data.pdf]

1  
2  
3  
4  
5  
6  
7  
8  
9  
10  
11  
12  
13  
14  
15  
16  
17  
18  
19  
20  
21  
22  
23  
24  
25  
26  
27  
28  
29  
30  
31  
32  
33

**BioClay™ prolongs RNA interference-mediated crop protection  
against *Botrytis cinerea***

Jonatan Niño-Sánchez<sup>1,2,3</sup>, Prabhakaran Thanjavur Sambasivam<sup>4</sup>, Anne Sawyer<sup>5,6</sup>, Rachael Hamby<sup>1</sup>, Angela Chen<sup>1</sup>, Elizabeth Czislowski<sup>6,7</sup>, Peng Li<sup>8</sup>, Narelle Manzie<sup>5</sup>, Donald M. Gardiner<sup>5</sup>, Rebecca Ford<sup>6</sup>, Zhi Ping Xu<sup>8</sup>, Neena Mitter<sup>6</sup> and Hailing Jin<sup>1</sup>

**SUPPORTING INFORMATION**

34  
35  
36  
37  
38  
39  
40  
41  
42  
43  
44  
45  
46  
47  
48  
49  
50  
51  
52  
53  
54  
55  
56  
57  
58  
59  
60  
61  
62  
63  
64  
65  
66  
67

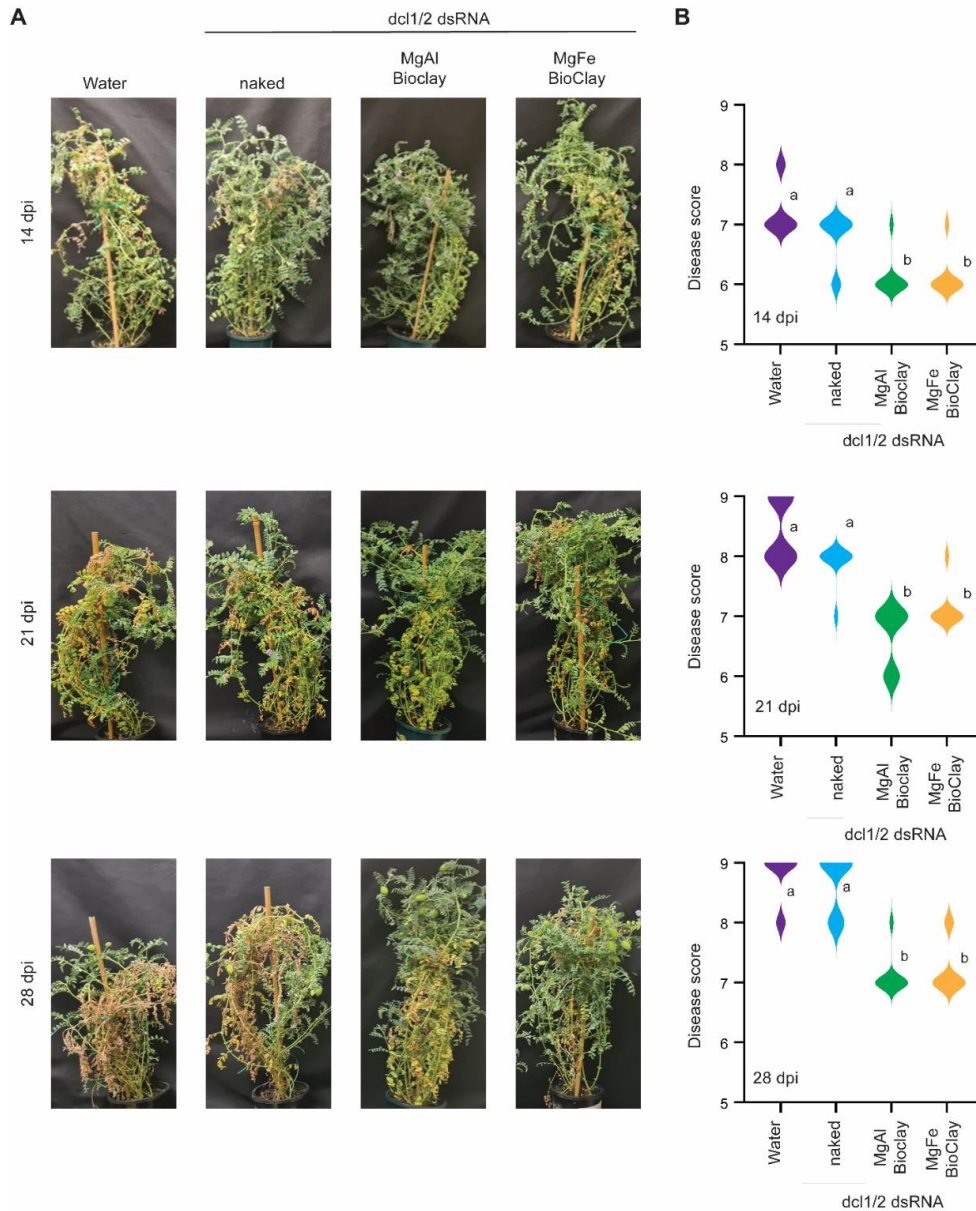

**Figure S1.** BioClay™ provides protection against Botrytis on chickpea plants in an independent assay

(A) representative images of chickpea plants infected with *B. cinerea* with and without dsRNA or BioClay™ targeting *DCL1/2*. (B) Plant disease was scored on an ordinal scale from 1-9 and data analysed using a Kruskal-Wallis test followed by Mann-Whitney tests for pairwise comparisons differences between treatments. Different letters indicate statistically significant ( $P < 0.05$ ) groupings. Each treatment group consisted of nine individual plants.

68

69

70 **dsRNA sequences**

71 >BcDCL1/2

72 TGC GGAAGAACTTGAAGGTTTGCTACACAGTCAAATATG TACTGCAGAAGATCCCAGCTTG  
73 CTGCAGTACTCAATCAAAGGTAAACCTGAGACTCTTGCCTACTATGATCCCTTGGGCCCGA  
74 AATTCAATACTCCTCTTTATCTTCAAATGCTCCCGCTTCTAAAAGACAATCCTATCTTTCGGA  
75 AGCCATTTGTATTTGGGACAGAAGCCAGTAGAACTCTAGGATCTTGGTGTGTTGACCAGAT  
76 CTGGACGGATGCCATTTGCTGCACGCCAAAAATACATCGAGCAGATCTTCGCCTTCGAGTA  
77 AAGCTACCACTTCTATCTATTATCTACTATACCCAGAGTCAAATATCATCGTGACGAAAAC  
78 TGTGGCGAGCCTGAGAAAGATTGTGCAAAGTCTCAACATTTTCGAAGACCCCTACGTTTTG  
79 AACTAAAAAGGAGTGATAGCGAAAAAAGTCAACGTGAGCTGGCGAAAGTACTCAAGAGT

80 >BcVDS

81 TTCGTTCCAGGAGTTACACGCAAAGATCACTTCACTGGTGGACCAGCAAAAAGATAGTAAA  
82 CATATCGGGAAAATATCGATATATATTCTCCGAATTCTACGAGATATCAGAGCAGAATTACC  
83 TAGTAACCCTGCACTACAAAAGTTTGGACTCTCACTTGTCTCATCATTTCGTGCTCTCGTCGA  
84 AAGCAAAGACAATAAAGAAGAACAATGGAGCGCGAGTTGGAGGGATTGCGAAGAGGAAG  
85 TGTTAGCAATCCTACTACGCATCGTACTAGTGCCATGAGCAGCGGAACTGTGACTCAGGAT  
86 AGGAATTCTCTCCAAGACAATAAGAGCACAGTTGTAAGCTGGACGTTGTTCAAAGTGCAGT  
87 GGCAAAGCGAGCACTTGAAATGCAGTTAAAGAATGAGGGACTAGATGTCACTCTACAAATT  
88 GATCAAACCTCAACAATGGTTCAATACTTTGTGGGCCGACAATGGTGACGCCATTTCTAAGC  
89 AATACGCTTCTACAGCAGCATTGAAGG
